# Supplementary material
Source: ML conference proceedings conference paper supplement (https://openreview.net/forum?id=qahLHQopsi)
Supplement: supplementary_material [file attachment]

---

# Is the Volume of a Credal Set a Good Measure for Epistemic Uncertainty? (Supplementary Material)

---

Yusuf Sale<sup>1,3</sup>

Michele Caprio<sup>2</sup>

Eyke Hüllermeier<sup>1,3</sup>

<sup>1</sup>Institute of Informatics, University of Munich (LMU), Germany

<sup>2</sup>PRECISE Center, Department of Computer and Information Science, University of Pennsylvania, USA

<sup>3</sup>Munich Center for Machine Learning, Germany

## A PROOFS

*Proof of Proposition 1.* Let  $\mathcal{P}, \mathcal{Q} \subset \Delta(\mathcal{Y}, \sigma(\mathcal{Y}))$  be credal sets, and assume  $|\mathcal{Y}| = 2$ . Then we have the following.

- $\text{Vol}(\mathcal{P}) \geq 0$  and  $\text{Vol}(\mathcal{P}) \leq \text{Vol}(\Delta^{2-1}) = \sqrt{2}$ . Hence  $\text{Vol}(\cdot)$  satisfies A1.
- The volume being a continuous functional is a well-known fact that comes from the continuity of the Lebesgue measure, so  $\text{Vol}(\cdot)$  satisfies A2.
- $\mathcal{Q} \subset \mathcal{P} \implies \text{Vol}(\mathcal{Q}) \leq \text{Vol}(\mathcal{P})$ . This comes from the fundamental property of the Lebesgue measure, so  $\text{Vol}(\cdot)$  satisfies A3.
- Consider a sequence  $(\mathcal{P}_n)$  of credal sets on  $(\mathcal{Y}, \sigma(\mathcal{Y}))$  such that  $\lim_{n \rightarrow \infty} [\overline{P}_n(A) - \underline{P}_n(A)] = 0$ , for all  $A \in \sigma(\mathcal{Y})$ . Then, this means that there exists  $N \in \mathbb{N}$  such that for all  $n \geq N$ , the geometric representation of  $\mathcal{P}_n$  is a subset of the geometric representation of  $\mathcal{P}_{n+1}$ . In addition, the limiting element of  $(\mathcal{P}_n)$  is a (multi)set  $\mathcal{P}^*$  whose elements are all equal to  $P^*$ , so its geometric representation is a point and its volume is 0. Hence, probability consistency is implied by continuity A3, so  $\text{Vol}(\cdot)$  satisfies A4'.
- The volume is invariant to rotation and translation. This is a well-known fact that comes from the fundamental property of the Lebesgue measure, so  $\text{Vol}(\cdot)$  satisfies A7.

Let us now show that the volume operator satisfies sub-additivity A5. Let  $\mathcal{Y} = \mathcal{Y}_1 \times \mathcal{Y}_2$ . In addition, suppose we are in the general case in which  $|\mathcal{Y}| = |\mathcal{Y}_1| = |\mathcal{Y}_2| = 2$ . In particular, let  $\mathcal{Y} = \{(y_1, y_2), (y_3, y_4)\}$ , so that  $\mathcal{Y}_1 = \{y_1, y_3\}$  and  $\mathcal{Y}_2 = \{y_2, y_4\}$ . Suppose also  $y_1 \neq y_3$  and  $y_2 \neq y_4$ . Now, pick any probability measure  $P$  on  $\mathcal{Y}$ . In general, we would have that its marginal  $\text{marg}_{\mathcal{Y}_1}(P) = P'$  on  $\mathcal{Y}_1$  is such that  $P'(y_i) = \sum_j P((y_i, y_j))$ . Similarly for marginal  $\text{marg}_{\mathcal{Y}_2}(P) = P''$  on  $\mathcal{Y}_2$ . In our case, though, the computation is easier. To see this, fix  $y_1$ . Then, we should sum over  $j$  the probability of  $(y_1, y_j)$ ,  $y_j \in \mathcal{Y}_2$ . But the only pair  $(y_1, y_j)$  is  $(y_1, y_2)$ . A similar argument holds if we fix  $y_3$ , or any of the elements of  $\mathcal{Y}_2$ . Hence, we have that

$$P'(y_1) = P((y_1, y_2)) = P''(y_2) \quad \text{and} \quad P'(y_3) = P((y_3, y_4)) = P''(y_4).$$

Let  $\mathcal{P}'$  and  $\mathcal{P}''$  denote the marginal convex sets of probability distributions on  $\mathcal{Y}_1$  and  $\mathcal{Y}_2$ , respectively, and let  $\mathcal{P}$  denote the convex set of joint probability distributions on  $\mathcal{Y} = \mathcal{Y}_1 \times \mathcal{Y}_2$  [Couso et al., 1999]. Then, given our argument above, we have that  $\text{Vol}(\mathcal{P}) < \text{Vol}(\mathcal{P}') + \text{Vol}(\mathcal{P}'') = 2\text{Vol}(\mathcal{P})$ . So in the general  $|\mathcal{Y}| = |\mathcal{Y}_1| = |\mathcal{Y}_2| = 2$  case where  $y_1 \neq y_3$  and  $y_2 \neq y_4$ , the volume is subadditive.  $\square$

*Proof of Proposition 2.* Immediate from the assumption on the instance of SI.  $\square$

*Proof of Theorem 1.* Pick any compact set  $\mathcal{P} \subset \mathcal{M}(\Omega, \mathcal{F})$  and any set  $\mathcal{Q}$  satisfying (a)-(c). Let  $B_r^d \subset \mathbb{R}^d$  denote a generic ball in  $\mathbb{R}^d$  of radius  $r > 0$ . Notice that  $N_{r-\epsilon}^{\text{pack}}(\mathcal{Q}') = N_{r-\epsilon}^{\text{pack}}(\mathcal{P}) - N_{r-\epsilon}^{\text{pack}}(\mathcal{Q}) \geq 0$  because  $\mathcal{P} \supset \mathcal{Q}$ . Then, the proof goes as

follows

$$\frac{\text{Vol}(\mathcal{P}) - \text{Vol}(\mathcal{Q}')}{\text{Vol}(\mathcal{P})} = \frac{\frac{1}{c(r,d,\mathcal{P})} \text{Vol}(\tilde{\mathcal{P}}_r) - \frac{1}{c(r-\epsilon,d,\mathcal{Q}')} \text{Vol}(\tilde{\mathcal{Q}}'_{r-\epsilon})}{\frac{1}{c(r,d,\mathcal{P})} \text{Vol}(\tilde{\mathcal{P}}_r)} \quad (1)$$

$$\geq \frac{\text{Vol}(\tilde{\mathcal{P}}_r) - \text{Vol}(\tilde{\mathcal{Q}}'_{r-\epsilon})}{\text{Vol}(\tilde{\mathcal{P}}_r)} \quad (2)$$

$$= \frac{N_r^{\text{pack}}(\mathcal{P}) \text{Vol}(B_r^d) - N_{r-\epsilon}^{\text{pack}}(\mathcal{Q}') \text{Vol}(B_{r-\epsilon}^d)}{N_r^{\text{pack}}(\mathcal{P}) \text{Vol}(B_r^d)} \quad (3)$$

$$= \frac{N_r^{\text{pack}}(\mathcal{P}) \text{Vol}(B_1^d) r^d - N_{r-\epsilon}^{\text{pack}}(\mathcal{Q}') \text{Vol}(B_1^d) (r-\epsilon)^d}{N_r^{\text{pack}}(\mathcal{P}) \text{Vol}(B_1^d) r^d} \quad (4)$$

$$= \frac{N_r^{\text{pack}}(\mathcal{P}) r^d - N_{r-\epsilon}^{\text{pack}}(\mathcal{Q}') (r-\epsilon)^d}{N_r^{\text{pack}}(\mathcal{P}) r^d}$$

$$= 1 - \frac{N_{r-\epsilon}^{\text{pack}}(\mathcal{Q}')}{N_r^{\text{pack}}(\mathcal{P})} \left(1 - \frac{\epsilon}{r}\right)^d$$

$$\geq 1 - \left(1 - \frac{\epsilon}{r}\right)^d, \quad (5)$$

where (1) comes from equation (3), (2) comes from the fact that  $r - \epsilon \leq r \implies c(r - \epsilon, d, \mathcal{Q}') \geq c(r, d, \mathcal{P})$  by (4), (3) comes from  $\tilde{\mathcal{P}}_r$  being the union of pairwise disjoint balls of radius  $r$ , (4) comes from properties of the volume of a ball of radius  $r$  in  $\mathbb{R}^d$ , and (5) comes from property (c) of  $\mathcal{Q}$ .  $\square$

## B HIGH-DIMENSIONAL PROBABILITY

Since Theorem 1 in Section 4.2 is intimately related with Carl-Pajor's Theorem [Ball and Pajor, 1990], we state (a version) of the theorem here.

**Theorem 1** (Carl-Pajor). *Let  $B_{1,d}$  denote the  $d$ -dimensional unit euclidean ball, and let  $\mathcal{P} \subset B_{1,d}$  be a polytope with  $m \in \mathbb{N}$  vertices. Then, we have*

$$\frac{\text{Vol}(\mathcal{P})}{\text{Vol}(B_{1,d})} \leq \left(4\sqrt{\frac{\log m}{d}}\right)^d. \quad (6)$$

For further results connecting high-dimensional probability and data science, see Vershynin [2018].
